# Supplementary material
Source: MDPI journal article supplement (https://www.mdpi.com/2073-4395/9/12/874)
Supplement: s1 [file s1]

# Comparison of SHD and open-center training systems in 'Soleta' variety almond tree orchards

José Casanova-Gascón, Marcos Figueras-Panillo, Ignasi Iglesias-Castellarnau and Pablo Martín-Ramos

## SUPPORTING INFORMATION

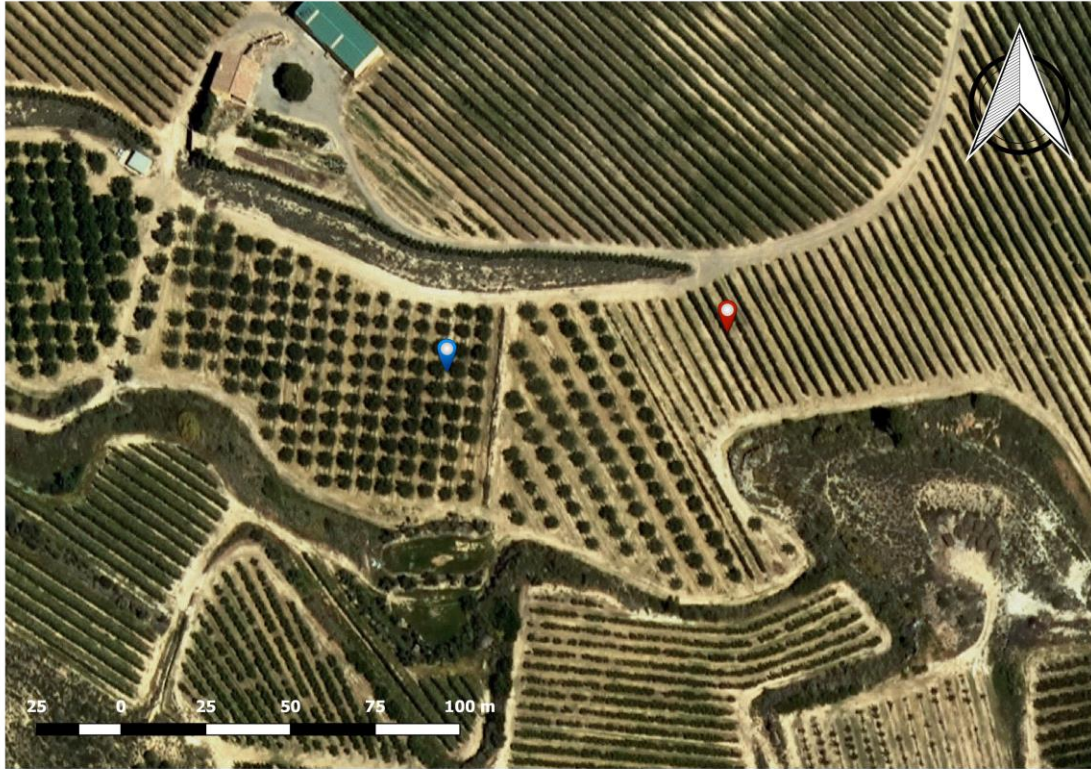

**Figure S1.** Location of the two plots of the experimental almond tree plantation in the “Mas d'en Félis” farm, in the municipality of La Granja d'Escarp, Lleida, Spain (polygon 5, plot 592; coordinates 41°24'41.7"N 0°22'39.4"E; 78 meters above sea level). The open-center trees were located in the plot with a blue marker, and the SHD trees were located in the plot with a red marker.

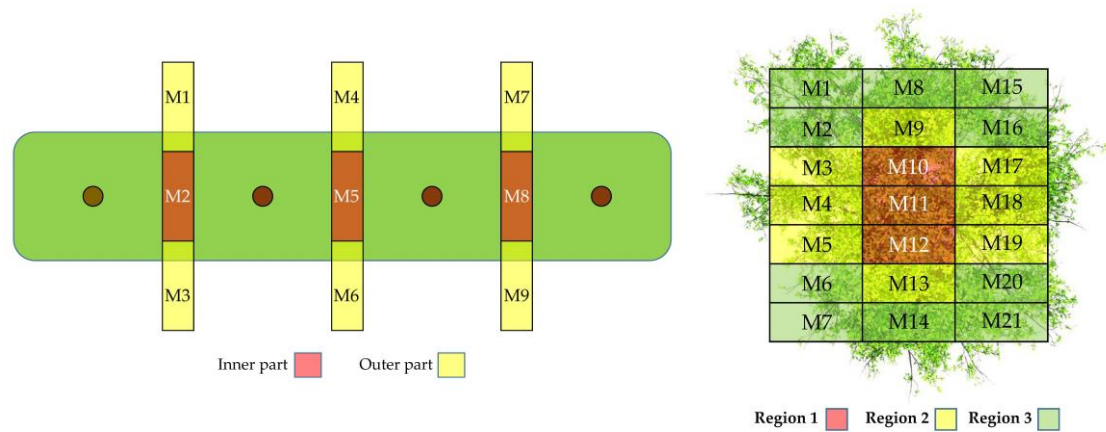

**Figure S2.** Procedure for PAR measurements at solar noon in the SHD trees (**left**) and the open-center trees (**right**). The dark brown circles in the scheme on the left represent the hedgerow trees trunks. M stands for measurement. The scale is different in the two schemes.

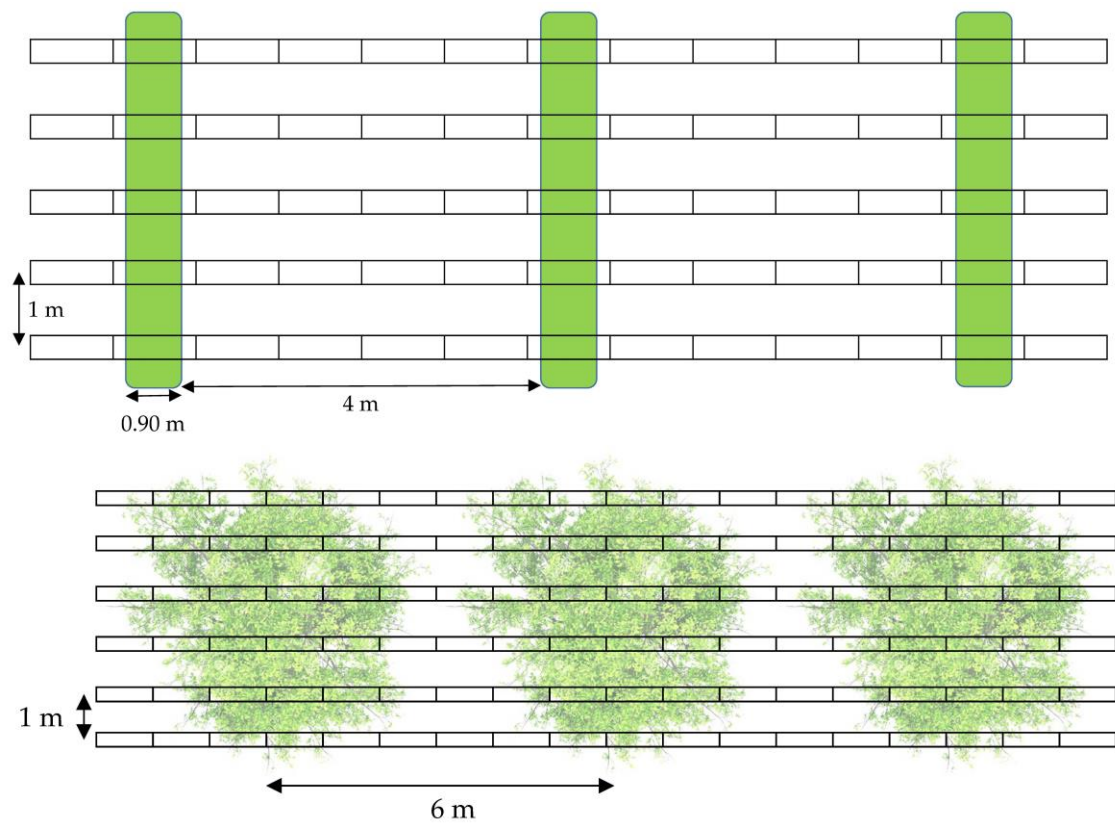

**Figure S3.** Procedure for PAR measurements at different times (every 60 or 90 minutes, from 8:00 am until 6:00 pm/6:30 pm, depending on the training system), on three dates, in the SHD trees (**top**) and the open-center trees (**bottom**). Each rectangle represents the bar of the ceptometer (probe length 84 cm, overall length 99 cm). The scale is different in the two schemes.

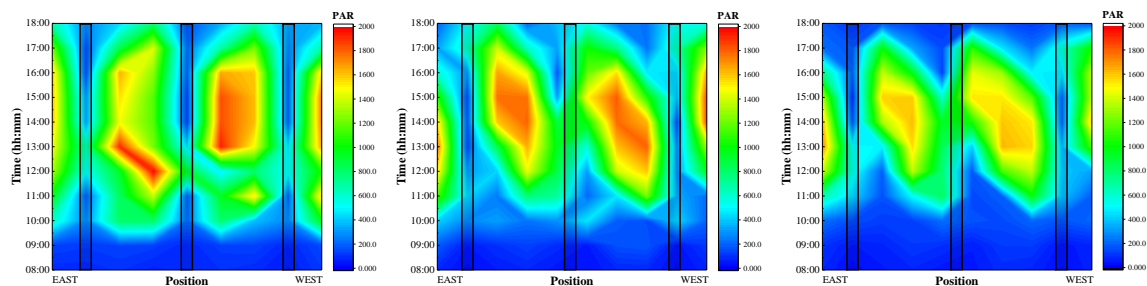

**Figure S4.** Evolution of PAR in the SHD system along a day in three different dates: June 24 (left), July 25 (center) and August 31, 2019 (right). The hedgerows are represented as semi-transparent rectangles.

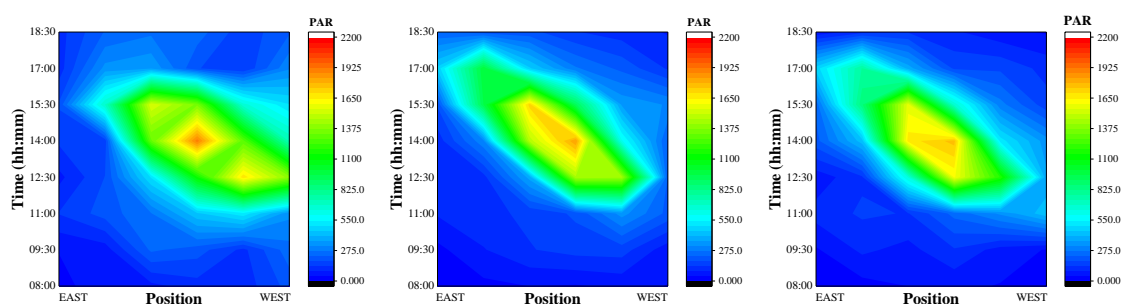

**Figure S5.** Evolution of PAR in the open-center trained trees along a day in three different dates: June 24 (left), July 25 (center) and August 31, 2019 (right). Only the space between two consecutive trees is shown (trunks correspond to the beginning and the end of the x-axis).

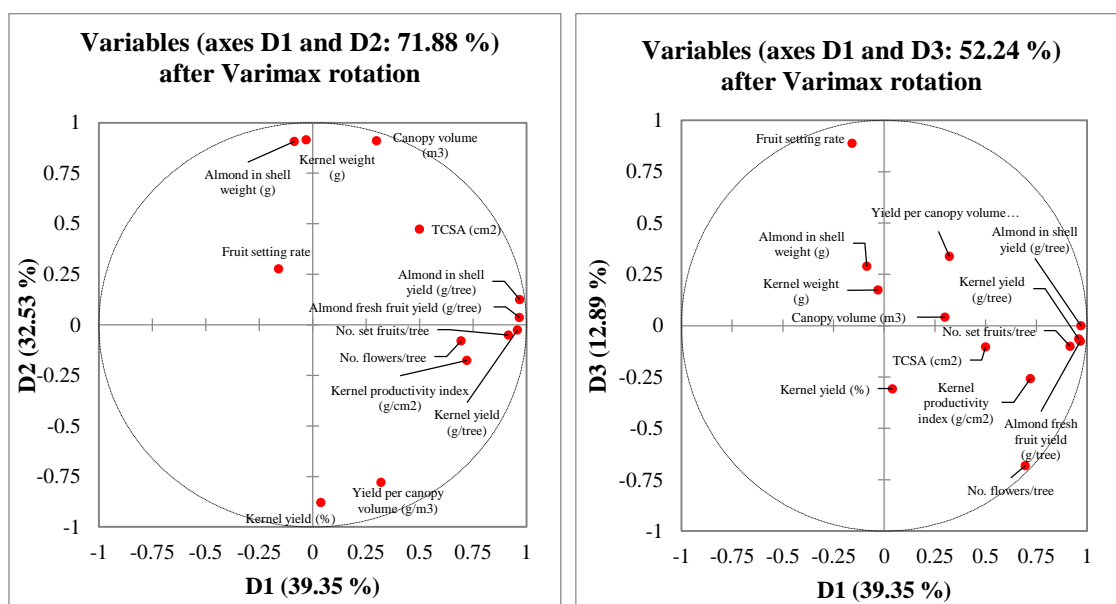

**Figure 6.** Correlation circles from PCA analysis.
